# Supplementary material for: Restraint Use for Child Occupants in Dubai, United Arab Emirates
Source: MDPI journal article supplement (doi:10.3390/ijerph19105966), 2022-05-13
Supplement: s1 [file s1]

## Restraint Use for Child Occupants in Dubai, United Arab Emirates

### Codebook SPSS variables

| SPSS Variable name | Full variable name                   | Coding instructions                                                                                                             | Measurement level          |
|--------------------|--------------------------------------|---------------------------------------------------------------------------------------------------------------------------------|----------------------------|
| id                 | Identification number                |                                                                                                                                 | 1=<br>2=<br>3=<br>4=<br>5= |
| Age                | age group                            | 1=18-25 years<br>2=26-35 years<br>3=36-49 years<br>4=50-74 years<br>5=75 years and older                                        |                            |
| Gender             | gender                               | 1=Male<br>2=Female                                                                                                              |                            |
| Education          | Highest level of education completed | 1=None<br>2=Middle School<br>3=High School<br>4=University Graduate degree<br>5=University Post Graduate degree (e.g., Masters) |                            |
| Nationality        | Nationality                          |                                                                                                                                 |                            |
| Residency          | UAE resident                         | 1=Yes<br>2=No                                                                                                                   |                            |
| Emirate            | If UAE resident, which emirate       |                                                                                                                                 |                            |
| Seats              | Number of seats in vehicle           |                                                                                                                                 |                            |
| Seatbelt           | adult seatbelt use                   | 1=Always<br>2=Almost always<br>3=Sometimes<br>4=Almost never<br>5=Never                                                         |                            |

## B. Use of restraints for child vehicle occupants

|    |                                                                                                            |                                                                                                                                                                                                                                                                                                                                                                                                                                                                                                                                                                                                                                                                                                                               |
|----|------------------------------------------------------------------------------------------------------------|-------------------------------------------------------------------------------------------------------------------------------------------------------------------------------------------------------------------------------------------------------------------------------------------------------------------------------------------------------------------------------------------------------------------------------------------------------------------------------------------------------------------------------------------------------------------------------------------------------------------------------------------------------------------------------------------------------------------------------|
| 12 | Number of children 0-10                                                                                    |                                                                                                                                                                                                                                                                                                                                                                                                                                                                                                                                                                                                                                                                                                                               |
| 13 | What is the age and gender of each of the children that you currently transport in your passenger vehicle? | <p>Child 1: Age ____ years ____ months<br/>Gender: <input type="checkbox"/> Male <input type="checkbox"/> Female</p> <p>Child 2: Age ____ years ____ months<br/>Gender: <input type="checkbox"/> Male <input type="checkbox"/> Female</p> <p>Child 3: Age ____ years ____ months<br/>Gender: <input type="checkbox"/> Male <input type="checkbox"/> Female</p> <p>Child 4: Age ____ years ____ months<br/>Gender: <input type="checkbox"/> Male <input type="checkbox"/> Female</p> <p>Child 5: Age ____ years ____ months<br/>Gender: <input type="checkbox"/> Male <input type="checkbox"/> Female</p> <p>Child 6: Age ____ years ____ months<br/>Gender: <input type="checkbox"/> Male <input type="checkbox"/> Female</p> |

Interviewers will Show the participant 'Restraint Type'

|    |                                                                                                                                                                                                  |                                                                                                                                                                                                                                                                                                                                                                                                                                                                                                                                                                                                                                                                                                                                                                                                                                                                                                                                                                                                                                                                                                                                                                                                                                                                                                                                                                                     |
|----|--------------------------------------------------------------------------------------------------------------------------------------------------------------------------------------------------|-------------------------------------------------------------------------------------------------------------------------------------------------------------------------------------------------------------------------------------------------------------------------------------------------------------------------------------------------------------------------------------------------------------------------------------------------------------------------------------------------------------------------------------------------------------------------------------------------------------------------------------------------------------------------------------------------------------------------------------------------------------------------------------------------------------------------------------------------------------------------------------------------------------------------------------------------------------------------------------------------------------------------------------------------------------------------------------------------------------------------------------------------------------------------------------------------------------------------------------------------------------------------------------------------------------------------------------------------------------------------------------|
| 14 | What kind of restraint does each of the children that you currently transport in your passenger vehicle use (choose from the restraint type pictures), and how often do they use this restraint? | <p>Child 1: Restraint type: ____<br/> <input type="checkbox"/> Always <input type="checkbox"/> Almost always <input type="checkbox"/> Sometimes<br/> <input type="checkbox"/> Almost never <input type="checkbox"/> Never</p> <p>Child 2: Restraint type: ____<br/> <input type="checkbox"/> Always <input type="checkbox"/> Almost always <input type="checkbox"/> Sometimes<br/> <input type="checkbox"/> Almost never <input type="checkbox"/> Never</p> <p>Child 3: Restraint type: ____<br/> <input type="checkbox"/> Always <input type="checkbox"/> Almost always <input type="checkbox"/> Sometimes<br/> <input type="checkbox"/> Almost never <input type="checkbox"/> Never</p> <p>Child 4: Restraint type: ____<br/> <input type="checkbox"/> Always <input type="checkbox"/> Almost always <input type="checkbox"/> Sometimes<br/> <input type="checkbox"/> Almost never <input type="checkbox"/> Never</p> <p>Child 5: Restraint type: ____<br/> <input type="checkbox"/> Always <input type="checkbox"/> Almost always <input type="checkbox"/> Sometimes<br/> <input type="checkbox"/> Almost never <input type="checkbox"/> Never</p> <p>Child 6: Restraint type: ____<br/> <input type="checkbox"/> Always <input type="checkbox"/> Almost always <input type="checkbox"/> Sometimes<br/> <input type="checkbox"/> Almost never <input type="checkbox"/> Never</p> |
| 15 | What is the most important reason that your child is not 'always' restrained during passenger vehicle travel?                                                                                    | <input type="checkbox"/> I don't have enough space in the vehicle<br><input type="checkbox"/> Child restraint systems or child seats are too expensive<br><input type="checkbox"/> My children feel uncomfortable or cry when restrained<br><input type="checkbox"/> Destinations are all close, only inside the city                                                                                                                                                                                                                                                                                                                                                                                                                                                                                                                                                                                                                                                                                                                                                                                                                                                                                                                                                                                                                                                               |

|    |                                                                                                      |                                                                                                                                                                                                                                                                                                                             |
|----|------------------------------------------------------------------------------------------------------|-----------------------------------------------------------------------------------------------------------------------------------------------------------------------------------------------------------------------------------------------------------------------------------------------------------------------------|
|    |                                                                                                      | <input type="checkbox"/> No legal penalty of not restraining child vehicle occupants it in Dubai<br><input type="checkbox"/> I don't believe it is important<br><input type="checkbox"/> Other reason(s): _____<br><input type="checkbox"/> Not applicable, my child is 'always' restrained during passenger vehicle travel |
| 16 | Are there any laws in Dubai about restraining your children while travelling in a passenger vehicle? | <input type="checkbox"/> No <input type="checkbox"/> Yes                                                                                                                                                                                                                                                                    |

### C. Choosing the car seat

|    |                                                                                                                       |                                                                                                                                                                                                                                                                                                                                                                                                                                                                                                         |
|----|-----------------------------------------------------------------------------------------------------------------------|---------------------------------------------------------------------------------------------------------------------------------------------------------------------------------------------------------------------------------------------------------------------------------------------------------------------------------------------------------------------------------------------------------------------------------------------------------------------------------------------------------|
| 17 | Where did you get your car seat from?                                                                                 | <input type="checkbox"/> Shop (in-store)<br><input type="checkbox"/> Shop (online)<br><input type="checkbox"/> Friend or relative<br><input type="checkbox"/> Other: _____<br><input type="checkbox"/> None, I do not use car seat                                                                                                                                                                                                                                                                      |
| 18 | What information sources did you use to choose the car seat?                                                          | <input type="checkbox"/> Word of mouth (e.g., friend or relative)<br><input type="checkbox"/> Car seat ranking websites<br><input type="checkbox"/> Official guidelines (e.g., RTA, Dubai Health Authority)<br><input type="checkbox"/> Sales people<br><input type="checkbox"/> Healthcare professionals (e.g., doctors, nurses)<br><input type="checkbox"/> Other: _____<br><input type="checkbox"/> Not applicable, I do not use a car seat                                                          |
| 19 | Did the information source include advice or instructions regarding the correct installation and use of the car seat? | <input type="checkbox"/> No <input type="checkbox"/> Yes<br><input type="checkbox"/> Not applicable, I do not use a car seat                                                                                                                                                                                                                                                                                                                                                                            |
| 20 | How useful was the information source for the installation and use of the car seat?                                   | <input type="checkbox"/> Very useful <input type="checkbox"/> Somewhat useful<br><input type="checkbox"/> Not at all useful<br><input type="checkbox"/> Not applicable, I do not use a car seat                                                                                                                                                                                                                                                                                                         |
| 21 | When choosing your car seat, what was the most important reason for your selection?                                   | <input type="checkbox"/> Price<br><input type="checkbox"/> Brand name and popularity<br><input type="checkbox"/> Safety features<br><input type="checkbox"/> Recommendations from friends or relatives<br><input type="checkbox"/> Recommendations from sales people<br><input type="checkbox"/> Recommendations from healthcare professionals<br><input type="checkbox"/> Child's comfort<br><input type="checkbox"/> Other: _____<br><input type="checkbox"/> Not applicable, I do not use a car seat |

### D. Using restraints for child vehicle occupants

|    |                                                                                                                    |                                                                                                                                                                                                                                                |                                                                                                                                                                                                                                                                                                                                                           |
|----|--------------------------------------------------------------------------------------------------------------------|------------------------------------------------------------------------------------------------------------------------------------------------------------------------------------------------------------------------------------------------|-----------------------------------------------------------------------------------------------------------------------------------------------------------------------------------------------------------------------------------------------------------------------------------------------------------------------------------------------------------|
| 22 | In your opinion, when should child vehicle occupants start using each of these restraint types?                    | <p>1. Capsule/Infant seat:<br/>Start at: _____<br/>years old</p> <p>2. Child seat:<br/>Start at: _____<br/>years old</p> <p>3. Booster seat:<br/>Start at: _____<br/>years old</p> <p>4. Adult seatbelt:<br/>Start at: _____<br/>years old</p> | <br><br><br> |
| 23 | In your opinion, when should child vehicle occupants be allowed to sit in the front seat of the passenger vehicle? | Start at: _____ years old                                                                                                                                                                                                                      |                                                                                                                                                                                                                                                                                                                                                           |

Thank you very much for completing this interview.

Your answers will be very helpful in improving our understanding about child vehicle occupant restraint use in Dubai.
